# Supplementary material
Source: publisher figshare collection journal article supplement (https://gsajournals.figshare.com/ndownloader/files/21531024)
Supplement: Supplementary file 1 [file 21531024]

## Sheet: Table S1 Strain list
Table S1. Strains used in this study
Strain	Genotype	Source
Y44	h-	Monahan Lab
Y47	h+ ura4-d18 leu1-32 ade6-m216 tup11::ura4+ tup12::ura4+ scr1::ura4+	Monahan Lab
D59	h- ura4-d18 leu1-32 ade6-m216 scr1::ura4+	Monahan Lab
D60	h+ ura4-d18 leu1-32 ade6-m216 scr1::ura4+	Monahan Lab
D163	h+ scr1::KanMX6	Vassiliadis et al. (2019)
D165	h- scr1::KanMX6	Vassiliadis et al. (2019)
D177	h- scr1::TAP-KanMX6	Vassiliadis et al. (2019)
D178	h+ scr1::TAP-KanMX6	Vassiliadis et al. (2019)
Wilmar-P	h90	Wilmar Ltd.
Wilmar-A	h90	Wilmar Ltd.
D75	Wilmar-P - h90 scr1::TAP-KanMX6	This study

## Sheet: Table S2 Wilmar Illumina stats
Table S2. Wilmar strain genome Illumina sequencing statistics
Statistic	Wilmar-A	Wilmar-P
Total number of sequenced reads	24239134	25466578
Total number of base pairs sequenced	2448152534	2572124378
% Reads Q30 or greater	89.52	89.69
% Reads Q20 or greater	96.93	97.02
% Ambiguous base calls (N)	0.002	0.002
% G/C content	35.46	35.68
Estimated reference genome coverage	194x	204x
% Mapped reads	0.9444	0.9627
% Unmapped reads	0.0556	0.0373
% Properly paired reads	0.9444	0.9627
% Mapped reads, both in pair	0.9319	0.9519
% Mapped reads, singletons	0.0126	0.0108
% Duplicated reads (estimated)	0.5493	0.5749
Actual coverage mean	182.4X	195.99X
Coverage standard deviation	470.38	411.65
Mapping quality mean	39.32	39.3
Insert size median	259	247
% Reference genome covered	>99	>99

## Sheet: Table S3 Variant stats
Table S3. Wilmar isolate variant analysis summary
Statistic	Wilmar-A	Wilmar-P
Total variants (SNPs, MNVs & INDELs) - pre filtering (freebayes)	54958	54936
Total variants (SNPs, MNVs & INDELs) - post filtering (snpSift)	47219	47217
Shared variants (SNPs, MNVs & INDELs)	46644
Total SNPs	38873	38882
Unique SNPs	663	444
SNPs within protein-coding genes	16469	16521
Synonymous SNPs	10559	10613
Non-synonymous SNPs	5907	5909
Unique NS-SNPs	52	54
Number of genes affected	2296	2301
Number of genes with 5 or more NS-SNPs	307	308
Total MNVs	2263	2272
Total INDELs	5419	5393

## Sheet: Table S4 Unique NS-SNPs
Table S4. Unique NS-SNPs in Wilmar-A and Wilmar-P
Strain	Chromosome	Start	End	Alt allele	VEP annotation	VEP impact	Gene	GeneID
Wilmar-P	I	1948	1948	T	missense_variant	MODERATE	tlh1	SPAC212.11
Wilmar-P	I	65397	65397	A	missense_variant	MODERATE	dak2	SPAC977.16c
Wilmar-P	I	638359	638359	T	missense_variant	MODERATE	oct1	SPAC1F3.10c
Wilmar-P	I	638544	638544	C	missense_variant	MODERATE	oct1	SPAC1F3.10c
Wilmar-P	I	638551	638551	A	missense_variant	MODERATE	oct1	SPAC1F3.10c
Wilmar-P	I	1468859	1468859	C	missense_variant	MODERATE	Tf2-1	SPAC9.04
Wilmar-P	I	1469582	1469582	C	missense_variant	MODERATE	Tf2-1	SPAC9.04
Wilmar-P	I	1567073	1567073	C	missense_variant	MODERATE	Tf2-2	SPAC167.08
Wilmar-P	I	3364404	3364404	C	missense_variant	MODERATE	Tf2-4	SPAC26A3.13c
Wilmar-P	I	3989145	3989145	G	missense_variant	MODERATE	pfl2	SPAPB15E9.01c
Wilmar-P	I	3989403	3989403	A	missense_variant	MODERATE	pfl2	SPAPB15E9.01c
Wilmar-P	I	4025543	4025543	C	missense_variant	MODERATE	Tf2-6	SPAC27E2.08
Wilmar-P	I	5058016	5058016	C	missense_variant	MODERATE	snt1	SPAC22E12.19
Wilmar-P	I	5198568	5198568	C	missense_variant	MODERATE	Tf2-8	SPAC19D5.09c
Wilmar-P	I	5508064	5508064	A	missense_variant	MODERATE	SPAC869.05c	SPAC869.05c
Wilmar-P	II	16444	16444	G	missense_variant	MODERATE	SPBC1348.06c	SPBC1348.06c
Wilmar-P	II	19782	19782	G	missense_variant	MODERATE	SPBC1348.07	SPBC1348.07
Wilmar-P	II	689330	689330	C	missense_variant	MODERATE	SPBPJ4664.02	SPBPJ4664.02
Wilmar-P	II	690537	690537	C	missense_variant	MODERATE	SPBPJ4664.02	SPBPJ4664.02
Wilmar-P	II	697847	697847	C	missense_variant	MODERATE	SPBPJ4664.02	SPBPJ4664.02
Wilmar-P	II	1802607	1802607	A	missense_variant	MODERATE	SPBC18H10.18c	SPBC18H10.18c
Wilmar-P	II	1967393	1967393	A	missense_variant	MODERATE	Tf2-10	SPBC1E8.04
Wilmar-P	II	1968195	1968195	C	missense_variant	MODERATE	Tf2-10	SPBC1E8.04
Wilmar-P	II	1968224	1968224	C	missense_variant	MODERATE	Tf2-10	SPBC1E8.04
Wilmar-P	II	1969124	1969124	C	missense_variant	MODERATE	Tf2-10	SPBC1E8.04
Wilmar-P	II	3135428	3135428	A	missense_variant	MODERATE	sep1	SPBC4C3.12
Wilmar-P	II	3943557	3943557	C	missense_variant	MODERATE	sec9	SPBC26H8.02c
Wilmar-P	II	4273713	4273713	T	missense_variant	MODERATE	meu7	SPBC16A3.13
Wilmar-P	II	4417708	4417708	C	missense_variant	MODERATE	Tf2-11	SPBC1289.17
Wilmar-P	II	4418222	4418222	C	missense_variant	MODERATE	Tf2-11	SPBC1289.17
Wilmar-P	II	4418392	4418392	C	missense_variant	MODERATE	Tf2-11	SPBC1289.17
Wilmar-P	II	4423495	4423495	A	missense_variant	MODERATE	pfl5	SPBC1289.15
Wilmar-P	III	38115	38115	G	missense_variant	MODERATE	SPCC1884.01	SPCC1884.01
Wilmar-P	III	38583	38583	A	missense_variant	MODERATE	SPCC1884.01	SPCC1884.01
Wilmar-P	III	174310	174310	C	missense_variant	MODERATE	SPCC1235.01	SPCC1235.01
Wilmar-P	III	174778	174778	T	missense_variant	MODERATE	SPCC1235.01	SPCC1235.01
Wilmar-P	III	221306	221306	T	missense_variant	MODERATE	wtf4	SPCC548.03c
Wilmar-P	III	221314	221314	G	missense_variant	MODERATE	wtf4	SPCC548.03c
Wilmar-P	III	615735	615735	C	missense_variant	MODERATE	wtf10	SPCC1183.10
Wilmar-P	III	1740029	1740029	A	missense_variant	MODERATE	wtf16	SPCC1450.08c
Wilmar-P	III	1740030	1740030	A	missense_variant	MODERATE	wtf16	SPCC1450.08c
Wilmar-P	III	1807798	1807798	C	missense_variant	MODERATE	wtf18	SPCC285.07c
Wilmar-P	III	1807890	1807890	A	missense_variant	MODERATE	wtf18	SPCC285.07c
Wilmar-P	III	2065386	2065386	T	missense_variant	MODERATE	wtf21	SPCC1739.15
Wilmar-P	III	2146154	2146154	G	missense_variant	MODERATE	wtf23	SPCC1620.02
Wilmar-P	III	2146690	2146690	T	missense_variant	MODERATE	wtf23	SPCC1620.02
Wilmar-P	III	2147200	2147200	C	missense_variant	MODERATE	wtf23	SPCC1620.02
Wilmar-P	III	2219533	2219533	C	missense_variant	MODERATE	wtf25	SPCC1919.06c
Wilmar-P	III	2320586	2320586	G	missense_variant	MODERATE	Tf2-13	SPCC1494.11c
Wilmar-P	III	2421613	2421613	G	missense_variant	MODERATE	SPCC569.06	SPCC569.06
Wilmar-P	III	2430977	2430977	T	missense_variant	MODERATE	SPCC569.03	SPCC569.03
Wilmar-P	III	2430996	2430996	T	missense_variant	MODERATE	SPCC569.03	SPCC569.03
Wilmar-P	III	2434962	2434962	G	missense_variant	MODERATE	SPCC569.01c	SPCC569.01c
Wilmar-P	MT	10861	10861	T	missense_variant	MODERATE	SPMIT.06	SPMIT.06
Wilmar-A	I	4870	4870	C	missense_variant	MODERATE	tlh1	SPAC212.11
Wilmar-A	I	638359	638359	T	missense_variant	MODERATE	oct1	SPAC1F3.10c
Wilmar-A	I	638544	638544	C	missense_variant	MODERATE	oct1	SPAC1F3.10c
Wilmar-A	I	638551	638551	A	missense_variant	MODERATE	oct1	SPAC1F3.10c
Wilmar-A	I	1828259	1828259	T	missense_variant	MODERATE	SPAC1002.16c	SPAC1002.16c
Wilmar-A	I	1970744	1970744	T	missense_variant	MODERATE	wis4	SPAC9G1.02
Wilmar-A	I	2871162	2871162	C	missense_variant	MODERATE	pvg1	SPAC8F11.10c
Wilmar-A	I	3989466	3989466	A	missense_variant	MODERATE	pfl2	SPAPB15E9.01c
Wilmar-A	I	4727461	4727461	T	missense_variant	MODERATE	cis4	SPAC17D4.03c
Wilmar-A	I	5346400	5346400	A	missense_variant	MODERATE	sec71	SPAC4D7.01c
Wilmar-A	II	22824	22824	T	missense_variant	MODERATE	SPBC1348.08c	SPBC1348.08c
Wilmar-A	II	58350	58350	T	missense_variant	MODERATE	eno102	SPBPB21E7.01c
Wilmar-A	II	65415	65415	T	missense_variant	MODERATE	SPBPB21E7.04c	SPBPB21E7.04c
Wilmar-A	II	153964	153964	A	missense_variant	MODERATE	mal1	SPBC1683.07
Wilmar-A	II	671077	671077	T	missense_variant	MODERATE	pfl3	SPBC947.04
Wilmar-A	II	690734	690734	G	missense_variant	MODERATE	SPBPJ4664.02	SPBPJ4664.02
Wilmar-A	II	697754	697754	C	missense_variant	MODERATE	SPBPJ4664.02	SPBPJ4664.02
Wilmar-A	II	874553	874553	A	missense_variant	MODERATE	pwp2	SPBC713.04c
Wilmar-A	II	1802850	1802850	G	missense_variant	MODERATE	SPBC18H10.18c	SPBC18H10.18c
Wilmar-A	II	1815605	1815605	C	missense_variant	MODERATE	Tf2-9	SPBC9B6.02c
Wilmar-A	II	2709497	2709497	G	missense_variant	MODERATE	vps901	SPBC4F6.10
Wilmar-A	II	3053845	3053845	A	missense_variant	MODERATE	leo1	SPBC13E7.08c
Wilmar-A	II	3135428	3135428	A	missense_variant	MODERATE	sep1	SPBC4C3.12
Wilmar-A	II	3305991	3305991	A	missense_variant	MODERATE	nep1	SPBC17D11.01
Wilmar-A	II	3969913	3969913	A	missense_variant	MODERATE	snf59	SPBC26H8.09c
Wilmar-A	II	4498434	4498434	A	missense_variant	MODERATE	SPBPB2B2.16c	SPBPB2B2.16c
Wilmar-A	III	37909	37909	C	missense_variant	MODERATE	SPCC1884.01	SPCC1884.01
Wilmar-A	III	174672	174672	G	missense_variant	MODERATE	SPCC1235.01	SPCC1235.01
Wilmar-A	III	174814	174814	T	missense_variant	MODERATE	SPCC1235.01	SPCC1235.01
Wilmar-A	III	222184	222184	C	missense_variant	MODERATE	wtf4	SPCC548.03c
Wilmar-A	III	240526	240526	C	missense_variant	MODERATE	zwf2	SPCC794.01c
Wilmar-A	III	428087	428087	T	missense_variant	MODERATE	wtf8	SPCC306.10
Wilmar-A	III	488236	488236	T	missense_variant	MODERATE	wtf9	SPCC970.11c
Wilmar-A	III	564197	564197	G	missense_variant	MODERATE	SPCC1672.14	SPCC1672.14
Wilmar-A	III	1310138	1310138	C	missense_variant	MODERATE	SPCC1322.10	SPCC1322.10
Wilmar-A	III	1739435	1739435	G	missense_variant	MODERATE	wtf16	SPCC1450.08c
Wilmar-A	III	1739898	1739898	T	missense_variant	MODERATE	wtf16	SPCC1450.08c
Wilmar-A	III	1739922	1739922	C	missense_variant	MODERATE	wtf16	SPCC1450.08c
Wilmar-A	III	1740546	1740546	T	missense_variant	MODERATE	wtf16	SPCC1450.08c
Wilmar-A	III	1807765	1807765	T	missense_variant	MODERATE	wtf18	SPCC285.07c
Wilmar-A	III	1855948	1855948	T	missense_variant	MODERATE	dfr1	SPCC1223.08c
Wilmar-A	III	2018368	2018368	T	missense_variant	MODERATE	wtf19	SPCC1906.03
Wilmar-A	III	2020665	2020665	G	missense_variant	MODERATE	wtf20	SPCC1906.04
Wilmar-A	III	2064767	2064767	G	missense_variant	MODERATE	wtf21	SPCC1739.15
Wilmar-A	III	2145809	2145809	A	missense_variant	MODERATE	wtf23	SPCC1620.02
Wilmar-A	III	2427357	2427357	C	missense_variant	MODERATE	SPCC569.04	SPCC569.04
Wilmar-A	III	2427373	2427373	A	missense_variant	MODERATE	SPCC569.04	SPCC569.04
Wilmar-A	III	2427416	2427416	C	missense_variant	MODERATE	SPCC569.04	SPCC569.04
Wilmar-A	III	2427428	2427428	T	missense_variant	MODERATE	SPCC569.04	SPCC569.04
Wilmar-A	III	2427439	2427439	G	missense_variant	MODERATE	SPCC569.04	SPCC569.04
Wilmar-A	MT	10858	10858	A	splice_donor_variant	HIGH	cob1	SPMIT.05
Wilmar-A	MT	10858	10858	A	stop_gained,start_lost	HIGH	SPMIT.06	SPMIT.06

## Sheet: Table S5 denovo assembly stats
Table S5. Wilmar-P de novo assembly statistics
Statistic	Wilmar-P
# contigs	11
# contigs (>= 0 bp)	11
# contigs (>= 1000 bp)	11
# contigs (>= 5000 bp)	8
# contigs (>= 10000 bp)	7
# contigs (>= 25000 bp)	6
# contigs (>= 50000 bp)	4
Largest contig	5601849
Total length	12887517
Total length (>= 0 bp)	12887517
Total length (>= 1000 bp)	12887517
Total length (>= 5000 bp)	12880369
Total length (>= 10000 bp)	12874381
Total length (>= 25000 bp)	12858573
Total length (>= 50000 bp)	12794054
N50	4696338
N75	4696338
GC (%)	36.04
# predicted rRNA genes	46 + 1 part
Size chromosome I	5601849
Size chromosome II	4696338
Size chromosome III	2495967
Size mitochondrial genome	19940

## Sheet: Table S6 Gene loss
Table S5 Genome features overlapping regions of zero sequence coverage within Wilmar strain background
Wilmar-A	Wilmar-P	Chr	Region start	Region end	Region Length	Gene ID	Name	Feature type	Description	Feature region affected
YES	YES	I	12716	12994	278	SPAC212.08c	SPAC212.08c	gene	GPI anchored protein (predicted)	3' coding region
YES	YES	I	13665	14555	890	SPAC212.07c	SPAC212.07c	pseudogene	SPAC212.07c	Entire gene
YES	YES	I	28961	29394	433	SPAC212.01c	SPAC212.01c	gene	S. pombe specific DUF999 family protein 2	Majority of coding region
YES	YES	I	203812	203907	95	SPNCRNA.621	SPNCRNA.621	ncRNA_gene	SPNCRNA.621	3' coding region
YES	YES	I	2944688	2945143	455	SPAPB2C8.01	SPAPB2C8.01	gene	cell surface glycoprotein, adhesion molecule (predicted)	3' coding region
YES	YES	I	3635143	3635200	57	SPNCRNA.923	SPNCRNA.923	ncRNA_gene	SPNCRNA.923	3' coding region
YES	YES	I	3983666	3983769	103	SPAPB18E9.04c	SPAPB18E9.04c	gene	sequence orphan	3' coding region
YES	YES	I	3993573	3994099	526	SPAPB15E9.02c	SPAPB15E9.02c	gene	dubious	5' UTR
YES	YES	I	3993573	3995104	1531	SPAPB15E9.06	SPAPB15E9.06	gene	dubious	Entire gene
YES	YES	I	5569261	5569501	240	SPAC750.06c	SPAC750.06c	gene	S. pombe specific DUF999 protein family 4	Majority of coding region
YES	YES	II	5674	6151	477	SPBC1348.01	SPBC1348.01	gene	S. pombe specific DUF999 protein family 5	Majority of coding region
YES	YES	II	33231	34780	1549	SPBC1348.11	SPBC1348.11	pseudogene	SPBC1348.11	Entire gene
YES	YES	II	35112	36288	1176	SPBC1348.12	SPBC1348.12	gene	transcription factor (predicted)	Majority of coding region
YES	YES	II	44694	46836	2142	SPBPB8B6.02c	SPBPB8B6.02c	gene	urea transporter (predicted)	Entire gene
YES	YES	II	47056	49071	2015	SPBPB8B6.03	SPBPB8B6.03	gene	Putative amidase	Entire gene
YES	YES	II	50110	52193	2083	SPNCRNA.1301	SPNCRNA.1301	ncRNA_gene	SPNCRNA.1301	Entire gene
YES	YES	II	47369	51220	3851	SPBPB8B6.04c	grt1	gene	transcription factor Grt1 (predicted)	Entire gene
YES	YES	II	56984	57037	53	SPBPB8B6.06c	SPBPB8B6.06c	gene	CRCB domain protein	5' UTR
YES	YES	II	58136	58307	171	SPBPB21E7.01c	eno102	gene	enolase (predicted)	3'UTR
YES	YES	II	59636	59704	68	SPBPB21E7.01c	eno102	gene	enolase (predicted)	5' coding region
YES	YES	II	60553	61205	652	SPBPB21E7.02c	SPBPB21E7.02c	gene	phosphoglycerate mutase family	Entire gene
YES	YES	II	61362	61632	270	SPBPB21E7.10	SPBPB21E7.10	gene	sequence orphan	5' UTR
YES	YES	II	61526	61632	106	SPBPB21E7.11	SPBPB21E7.11	gene	sequence orphan	3'UTR
YES	YES	II	61897	62126	229	SPBPB21E7.10	SPBPB21E7.10	gene	sequence orphan	3'UTR
YES	YES	II	61897	62221	324	SPBPB21E7.11	SPBPB21E7.11	gene	sequence orphan	5' UTR
YES	YES	II	63602	64286	684	SPNCRNA.1303	SPNCRNA.1303	ncRNA_gene	SPNCRNA.1303	Entire gene
YES	YES	II	63695	64021	326	SPNCRNA.289	SPNCRNA.289	ncRNA_gene	SPNCRNA.289	Entire gene
YES	YES	II	64487	64660	173	SPBPB21E7.04c	SPBPB21E7.04c	gene	human COMT ortholog 2	5' UTR
YES	YES	II	65519	65620	101	SPBPB21E7.04c	SPBPB21E7.04c	gene	human COMT ortholog 2	5' coding region
YES	YES	II	65519	65785	266	SPNCRNA.1304	SPNCRNA.1304	ncRNA_gene	SPNCRNA.1304	Entire gene
YES	YES	II	66842	67225	383	SPBPB21E7.05	SPBPB21E7.05	gene	sequence orphan	Entire gene
YES	YES	II	68355	68852	497	SPBPB21E7.06	SPBPB21E7.06	pseudogene	SPBPB21E7.06	Entire gene
YES	YES	II	65927	66274	347	SPNCRNA.1304	SPNCRNA.1304	ncRNA_gene	SPNCRNA.1304	Majority of coding region
YES	YES	II	356239	358079	1840	SPBC1271.08c	SPBC1271.08c	gene	sequence orphan	Majority of coding region
YES	YES	II	356239	357265	1026	SPNCRNA.1344	SPNCRNA.1344	ncRNA_gene	SPNCRNA.1344	Majority of coding region
YES	YES	II	358067	359852	1785	SPBC1271.07c	SPBC1271.07c	gene	N-acetyltransferase (predicted)	Entire gene
YES	YES	II	358510	359373	863	SPNCRNA.1345	SPNCRNA.1345	ncRNA_gene	SPNCRNA.1345	Entire gene
YES	YES	II	359391	359852	461	SPNCRNA.1346	SPNCRNA.1346	ncRNA_gene	SPNCRNA.1346	Entire gene
YES	YES	II	524655	524763	108	SPBC1685.12c	SPBC1685.12c	gene	dubious	5' UTR
YES	YES	II	524655	524763	108	SPNCRNA.1367	SPNCRNA.1367	ncRNA_gene	SPNCRNA.1367	3' coding region
YES	YES	II	671551	671618	67	SPBC947.04	pfl3	gene	cell surface glycoprotein (predicted), DIPSY family	5' coding region
YES	YES	II	1553753	1554090	337	SPNCRNA.1442	SPNCRNA.1442	ncRNA_gene	SPNCRNA.1442	Majority of coding region
YES	YES	II	4420902	4421116	214	SPBC1289.15	pfl5	gene	cell surface glycoprotein (predicted)	Majority of coding region
YES	YES	II	4461820	4462134	314	SPBPB2B2.02	mug180	gene	esterase/lipase (predicted)	3' UTR
YES	YES	II	4464625	4466286	1661	SPNCRNA.1696	SPNCRNA.1696	ncRNA_gene	SPNCRNA.1696	Entire gene
YES	YES	II	4465475	4466352	877	SPNCRNA.532	SPNCRNA.532	ncRNA_gene	SPNCRNA.532	Entire gene
YES	YES	II	4466517	4467612	1095	SPBPB2B2.05	SPBPB2B2.05	gene	peptidase family C26 protein	Entire gene
YES	YES	II	4469018	4471207	2189	SPBPB2B2.06c	SPBPB2B2.06c	gene	phosphoprotein phosphatase (predicted)	Entire gene
YES	YES	II	4475953	4476674	721	SPBPB2B2.08	SPBPB2B2.08	gene	conserved fungal protein	Entire gene
YES	YES	II	4478687	4480222	1535	SPBPB2B2.09c	SPBPB2B2.09c	gene	2-dehydropantoate 2-reductase (predicted)	Entire gene
YES	YES	II	4482234	4483799	1565	SPBPB2B2.10c	gal7	gene	galactose-1-phosphate uridylyltransferase Gal7	Entire gene
YES	YES	II	4483683	4487313	3630	SPBPB2B2.11	SPBPB2B2.11	gene	nucleotide-sugar 4,6-dehydratase (predicted)	Entire gene
YES	YES	II	4484023	4487569	3546	SPBPB2B2.12c	gal10	gene	UDP-glucose 4-epimerase/aldose 1-epimerase Gal10	Entire gene
YES	YES	II	4488322	4490271	1949	SPBPB2B2.13	gal1	gene	galactokinase Gal1	Entire gene
YES	YES	II	4488684	4489829	1145	SPNCRNA.1697	SPNCRNA.1697	ncRNA_gene	SPNCRNA.1697	Entire gene
YES	YES	II	4503038	4503134	96	SPBPB2B2.18	SPBPB2B2.18	gene	sequence orphan	Exon 3
YES	YES	II	4506844	4507229	385	SPBCPT2R1.01c	SPBCPT2R1.01c	gene	S. pombe specific DUF999 protein family 9	Majority of coding region
YES	YES	II	4514070	4514377	307	SPBCPT2R1.04c	SPBCPT2R1.04c	gene	S. pombe specific DUF999 protein family 10	Majority of coding region
YES	YES	III	31524	31740	216	SPCP20C8.02c	SPCP20C8.02c	gene	S. pombe specific UPF0321 family protein 1	5' UTR
YES	YES	III	32624	32865	241	SPCP20C8.03	SPCP20C8.03	pseudogene	SPCP20C8.03	Entire gene
YES	YES	III	33255	33393	138	SPCP20C8.03	SPCP20C8.03	pseudogene	SPCP20C8.03	Entire gene
YES	YES	III	43545	43629	84	SPCC1884.02	nic1	gene	NiCoT heavy metal ion transporter Nic1	5' UTR
YES	YES	III	937803	938567	764	SPCC24B10.20	SPCC24B10.20	gene	short chain dehydrogenase (predicted)	Entire gene
YES	YES	III	1646645	1647396	751	SPCC663.07c	SPCC663.07c	pseudogene	SPCC663.07c	Entire gene
YES	YES	III	1647025	1648537	1512	SPNCRNA.1213	SPNCRNA.1213	ncRNA_gene	SPNCRNA.1213	Majority of coding region
YES	YES	III	1647689	1648537	848	SPCC663.08c	SPCC663.08c	gene	short chain dehydrogenase	Majority of coding region
YES	YES	III	2422562	2422620	58	SPNCRNA.1296	SPNCRNA.1296	ncRNA_gene	SPNCRNA.1296	5' coding region
YES	YES	III	2427705	2427780	75	SPCC569.05c	SPCC569.05c	gene	spermidine family transporter (predicted)	3'UTR
YES	YES	MT	5564	6247	683	SPMIT.01	cox1	gene	cytochrome c oxidase 1 (predicted)	Intron 1
YES	YES	MT	5564	6247	683	SPMIT.02	SPMIT.02	gene	mitochondrial DNA binding endonuclease (predicted)	Majority of coding region
YES	YES	MT	10877	13357	2480	SPMIT.05	cob1	gene	cytochrome b, Cob1 (predicted)	Intron 1
YES	YES	MT	10877	13280	2403	SPMIT.06	SPMIT.06	gene	mitochondrial DNA binding endonuclease (predicted)	Majority of coding region
					61311

## Sheet: Table S7 Wilmar-P duplication
Table S3 Genes within the Wilmar-P duplication
Gene ID	Gene	Description	Feature type	Chr	Strand	Start	End
SPNCRNA.455	SPNCRNA.455	non-coding RNA (predicted)	ncRNA	III	1	120113	120204
SPCC330.07c	SPCC330.07c	membrane transporter (predicted)	protein_coding	III	-1	120540	122896
SPCC330.08	alg11	alpha-1,2-mannosyltransferase Alg11	protein_coding	III	1	124222	127134
SPCC330.09	SPCC330.09	rRNA processing protein Enp2 (predicted)	protein_coding	III	1	127209	129460
SPCC330.10	pcm1	P-TEFb-cap methyltransferase Pcm1	protein_coding	III	1	129661	131013
SPCC330.11	btb1	BTB/POZ domain protein Btb1	protein_coding	III	1	131517	135560
SPCC330.12c	sdh3	succinate dehydrogenase (ubiquinone) cytochrome b subunit (predicted)	protein_coding	III	-1	135724	136696
SPNCRNA.1112	SPNCRNA.1112	antisense RNA (predicted) possible alternative UTR	ncRNA	III	-1	136635	137551
SPCC330.13	rpc37	DNA-directed RNA polymerase III complex subunit Rpc37 (predicted)	protein_coding	III	1	136733	137783
SPCC330.14c	rpl2402	60S ribosomal protein L24 (predicted)	protein_coding	III	-1	137970	138594
SPCC320.14	SPCC320.14	threo-3-hydroxyaspartate ammonia-lyase (predicted)	protein_coding	III	-1	138959	140937
SPCTRNAGLU.09	SPCTRNAGLU.09	tRNA Glutamic acid	tRNA	III	1	140967	141038
SPNCRNA.456	SPNCRNA.456	non-coding RNA (predicted)	ncRNA	III	1	141220	141422
SPNCRNA.457	SPNCRNA.457	antisense RNA (predicted)	ncRNA	III	-1	141429	141634
SPCC320.13c	ark1	aurora-B kinase Ark1	protein_coding	III	1	141627	143038
SPCC320.12	atp23	mitochondrial inner membrane peptidase Atp23 (predicted)	protein_coding	III	-1	142939	144172
SPCC320.11c	SPCC320.11c	RNA-binding protein involved in ribosome biogenesis (predicted)	protein_coding	III	1	144336	145562
SPCC320.10	srp72	signal recognition particle subunit Srp72 (predicted)	protein_coding	III	-1	146165	148226
SPCC320.09	hem15	ferrochelatase Hem15 (predicted)	protein_coding	III	-1	148547	150823
SPNCRNA.1113	SPNCRNA.1113	antisense RNA (predicted)	ncRNA	III	1	150306	151925
SPCC320.08	SPCC320.08	membrane transporter (predicted)	protein_coding	III	-1	151093	152877
SPCC320.06	SPCC320.06	conserved fungal protein	protein_coding	III	-1	152941	159654
SPNCRNA.1114	SPNCRNA.1114	intergenic RNA (predicted)	ncRNA	III	1	153044	153390
SPCC320.07c	mde7	RNA-binding protein Mde7	protein_coding	III	1	155906	158191
SPCC320.05	SPCC320.05	sulphate transporter (predicted)	protein_coding	III	-1	159613	162339
SPCC320.04c	SPCC320.04c	GTPase Gem1 (predicted)	protein_coding	III	1	162907	165664
SPCC320.03	SPCC320.03	transcription factor (predicted)	protein_coding	III	-1	165563	170811
SPNCRNA.1115	SPNCRNA.1115	intergenic RNA (predicted) possible alternative UTR	ncRNA	III	1	170340	174289
SPNCRNA.458	SPNCRNA.458	non-coding RNA (predicted)	ncRNA	III	1	170771	173539
SPNCRNA.1116	SPNCRNA.1116	intergenic RNA (predicted)	ncRNA	III	-1	170851	173547
SPCC1235.01	SPCC1235.01	sequence orphan	protein_coding	III	1	174097	176473
SPCC1235.02	bio2	biotin synthase	protein_coding	III	1	176681	178818
SPCC1235.03	SPCC1235.03	SMR domain protein possibly involved in DNA repair	protein_coding	III	1	178975	180813
SPCC1235.04c	SPCC1235.04c	FAD synthetase (predicted)	protein_coding	III	-1	180697	182489
SPCC1235.05c	fft2	SMARCAD1 family ATP-dependent DNA helicase Fft2 (predicted)	protein_coding	III	-1	182768	186998
SPNCRNA.1117	SPNCRNA.1117	antisense RNA (predicted) possible alternative UTR	ncRNA	III	1	186332	187386
SPCC1235.16	vma21	vacuolar H+-ATPase assembly protein Vma21 (predicted)	protein_coding	III	1	187330	188988
SPCC1235.06	sif1	Sad1 interacting factor 1	protein_coding	III	1	189068	190401
SPCC1235.07	fta7	CENP-Q homolog Fta7	protein_coding	III	1	190580	192114
SPCC1235.08c	pdh1	DUF1751 family protein	protein_coding	III	-1	191695	194803
SPCC1235.09	hif2	Set3 complex subunit Hif2	protein_coding	III	1	194371	196528
SPCC1235.10c	sec6	exocyst complex subunit Sec6	protein_coding	III	-1	196513	199449
SPCC1235.11	mpc1	mitochondrial pyruvate transmembrane transporter subunit Mpc1	protein_coding	III	1	200020	201625
SPCC1235.12c	mug146	meiotically upregulated gene Mug46	protein_coding	III	-1	201551	202707
SPNCRNA.1118	SPNCRNA.1118	antisense RNA (predicted)	ncRNA	III	-1	204633	206912
SPCC1235.13	ght6	hexose transporter Ght6	protein_coding	III	1	204706	206717
SPCC1235.17	SPCC1235.17	dubious	protein_coding	III	-1	207225	211270
SPCC1235.14	ght5	hexose transporter Ght5	protein_coding	III	1	212160	214376
SPCC1235.15	dga1	diacylglycerol O-acyltransferase Dga1	protein_coding	III	1	215297	217099
SPNCRNA.1119	SPNCRNA.1119	intergenic RNA (predicted)	ncRNA	III	-1	217516	218406
SPCC548.02c	wtf3	pseudogene wtf element Wtf3 (no methionine)	pseudogene	III	-1	219185	220283

## Sheet: Table S8 other CNV loci
Table S8 Loci showing putative CNV in the Wilmar genetic background
Gene ID	Name	Description
SPBC29A3.01	ccc2	Golgi copper transporting ATPase Ccc2 (predicted)
SPAC977.16c	dak2	dihydroxyacetone kinase Dak2
SPAC513.01c	eft201	translation elongation factor 2 (EF-2) Eft2,A
SPBC29A3.02c	his7	phosphoribosyl-AMP cyclohydrolase/phosphoribosyl- ATP pyrophosphohydrolase His7
SPBC1683.07	mal1	maltase alpha-glucosidase Mal1
SPAP11E10.02c	mam3	cell surface adhesion protein for conjugation Mam3
SPCP20C8.04	new22	mug2/mug135/meu2 family
SPAC212.11	tlh1	RecQ type DNA helicase
SPAC212.04c		S. pombe specific DUF999 family protein 1
SPAC869.05c		plasma membrane sulfate transmembrane transporter (predicted)
SPBC29A3.21		Schizosaccharomyces pombe specific protein
SPCC1682.06		Schizosaccharomyces specific protein
SPCC1884.01		Schizosaccharomyces pombe specific protein
SPCC569.02c		S. pombe specific UPF0321 family protein 2
SPCC569.03		mug2/mug135/meu2 family
SPCC569.05c		plasma membrane spermidine family transmembrane transporter (predicted)

## Sheet: Table S9 novel genes BLAST
Table S9 BLAST analysis of novel ORFs in the Wilmar genetic background
Wilmar-A	Wilmar-P	Region	ORF Name	BLASTp											BLASTn
				Query Length (amino acids)	Top Hit Accession	Top Hit Description	Species	% Query Cover	% Hit Cover	% Sequence Identity	E-Value	Closest S. pombe Hit	% S. pombe closest hit Identity	% S. pombe closest hit Query Cover	Query Length (base pairs)	Top Hit Accession	Top Hit Description	Species	% Query Cover	% Hit Cover	% Sequence Identity	E-Value	Closest S. pombe Hit Accession	% S. pombe closest hit Identity	% S. pombe closest hit Query Cover
YES	YES	Region 1	Wilmar-P_II_LHS_10224_6_1	311	NP_001343051.1	RecQ type DNA helicase Tlh1	Schizosaccharomyces pombe	98.1	15.6	96.7	0	N/A	N/A	N/A	933	NM_001355852.1	RecQ type DNA helicase Tlh1 (tlh2), partial mRNA	Schizosaccharomyces pombe	100	15.2	96.9	0	N/A	N/A	N/A
YES	YES	Region 1	Wilmar-P_II_LHS_11880_3_2	173	N/A	N/A	N/A	N/A	N/A	N/A	N/A	N/A	N/A	N/A	519	NM_001355852.1	RecQ type DNA helicase Tlh1 (tlh2), partial mRNA	Schizosaccharomyces pombe	100	8.6	99.6	0	N/A	N/A	N/A
YES	YES	Region 1	Wilmar-P_II_LHS_11108_5_3	1734	NP_595040.1	RecQ type DNA helicase partial	Schizosaccharomyces pombe	94.1	85.8	96.3	0	N/A	N/A	N/A	5202	NM_001018168.1	RecQ type DNA helicase Tlh1 (tlh2), partial mRNA	Schizosaccharomyces pombe	94.2	85.9	97.3	0	N/A	N/A	N/A
YES	YES	Region 1	Wilmar-P_II_LHS_17159_2_4	428	N/A	N/A	N/A	N/A	N/A	N/A	N/A	N/A	N/A	N/A	1284	N/A	N/A	N/A	N/A	N/A	N/A	N/A	N/A	N/A	N/A
YES	YES	Region 1	Wilmar-P_II_LHS_17134_1_5	597	N/A	N/A	N/A	N/A	N/A	N/A	N/A	N/A	N/A	N/A	1791	N/A	N/A	N/A	N/A	N/A	N/A	N/A	N/A	N/A	N/A
YES	YES	Region 1	Wilmar-P_II_LHS_17031_3_6	683	N/A	N/A	N/A	N/A	N/A	N/A	N/A	N/A	N/A	N/A	2049	N/A	N/A	N/A	N/A	N/A	N/A	N/A	N/A	N/A	N/A
YES	YES	Region 1	Wilmar-P_II_LHS_22777_4_7	1810	XP_013020847.1	hypothetical protein SOCG_06266	Schizosaccharomyces octosporus yFS286	100	85.2	96.4	0	NP_001343051.1 - RecQ type DNA helicase Tlh1	59.6	81.6	5430	XM_013162420.1	hypothetical protein partial mRNA	Schizosaccharomyces octosporus yFS286	87.1	89.9	98	0	NM_001355852.1	72.7	48.5
YES	YES	Region 1	Wilmar-P_II_LHS_29840_5_8	195	KOS40269.1	hypothetical protein ACN38_g8863	Penicillium nordicum	84.6	68.6	77	1e-89	NP_588521.1 - putative amino acid transporter	49.2	88	585	XM_013160417.1	hypothetical protein partial mRNA	Schizosaccharomyces octosporus yFS286	73.2	98.8	99.6	4e-140	N/A	N/A	N/A
YES	YES	Region 1	Wilmar-P_II_LHS_32018_5_9	258	XP_013019555.1	hypothetical protein SOCG_16325	Schizosaccharomyces octosporus yFS286	82.6	96.4	99.5	7e-155	NP_587988.1 - uncharacterized protein SPCC16A11.01	57	71	774	XM_013164101.1	hypothetical protein partial mRNA	Schizosaccharomyces octosporus yFS286	100	45.4	99.5	0	NM_001022979.2	64.8	78.8
YES	YES	Region 1	Wilmar-P_II_LHS_35206_4_10	355	XP_013020313.1	alcohol dehydrogenase	Schizosaccharomyces octosporus yFS286	98.3	100	100	0	NP_595121.1 - putative alcohol dehydrogenase	64.7	100	1065	XM_013164859.1	alcohol dehydrogenase mRNA	Schizosaccharomyces octosporus yFS286	100	80.9	99.9	0	NM_001021028.2	65.5	94.4
YES	YES	Region 1	Wilmar-P_II_LHS_38016_3_11	578	XP_013020312.1	arylsulfatase	Schizosaccharomyces octosporus yFS286	97.1	100	100	0	NP_595046.1 - putative arylsulfatase	55.9	94.6	1734	XM_013164858.1	arylsulfatase partial mRNA	Schizosaccharomyces octosporus yFS286	100	92.8	99.9	0	NR_150178.1	67.6	44.7
YES	YES	Region 1	Wilmar-P_II_LHS_40663_1_12	255	XP_013020311.1	alpha-ketoglutarate-dependent sulfonate dioxygenase	Schizosaccharomyces octosporus yFS286	78.4	49.3	99.5	9e-142	sp|B5BP48.1 - Putative alpha-ketoglutarate-dependent sulfonate dioxygenase	55.3	43	765	XM_013164857.1	alpha-ketoglutarate-dependent sulfonate dioxygenase mRNA	Schizosaccharomyces octosporus yFS286	100	51	99.7	0	AB325691.1	70.7	35.4
YES	YES	Region 1	Wilmar-P_II_LHS_41286_3_13	218	XP_013020311.1	alpha-ketoglutarate-dependent sulfonate dioxygenase	Schizosaccharomyces octosporus yFS286	94.5	50.7	100	2e-148	sp|B5BP48.1 - Putative alpha-ketoglutarate-dependent sulfonate dioxygenase	61.2	52.4	654	XM_013164857.1	alpha-ketoglutarate-dependent sulfonate dioxygenase mRNA	Schizosaccharomyces octosporus yFS286	100	43.6	99.8	0	AB325691.1	64.4	81.2
YES	YES	Region 1	Wilmar-P_II_LHS_42284_5_14	535	XP_013020310.1	aromatic amino acid aminotransferase	Schizosaccharomyces octosporus yFS286	91.8	100	100	0	NP_588566.1 - putative aromatic aminotransferase	62.5	99.6	1605	XM_013164856.1	aromatic amino acid aminotransferase partial mRNA	Schizosaccharomyces octosporus yFS286	91.8	99.8	100	0	NM_001023553.2	66.5	51.2
YES	YES	Region 1	Wilmar-P_II_LHS_44513_5_15	257	XP_013020309.1	elongation factor 1-gamma	Schizosaccharomyces octosporus yFS286	88.7	100	100	4e-166	sp|P40921.1 - Elongation factor 1-gamma	40.8	53.1	771	XM_013164855.1	elongation factor 1-gamma mRNA	Schizosaccharomyces octosporus yFS286	100	57.8	99.9	0	N/A	N/A	N/A
YES	YES	Region 1	Wilmar-P_II_LHS_48914_2_16	316	XP_013020308.1	CRCB domain-containing protein	Schizosaccharomyces octosporus yFS286	94.3	100	100	0	NP_001018767.1 - CRCB domain protein	70.3	99.7	948	XM_013164854.1	CRCB domain-containing protein partial mRNA	Schizosaccharomyces octosporus yFS286	94.3	99.7	100	0	NM_001018183.2	68.1	73.6
YES	YES	Region 1	Wilmar-P_II_LHS_50400_6_17	222	XP_013020307.1	NADPH-dependent FMN reductase	Schizosaccharomyces octosporus yFS286	91.9	100	100	3e-150	N/A	N/A	N/A	666	XM_013164853.1	NADPH-dependent FMN reductase partial mRNA	Schizosaccharomyces octosporus yFS286	91.9	99.5	100	0	N/A	N/A	N/A
YES	YES	Region 1	Wilmar-P_II_LHS_52106_2_18	609	XP_013020306.1	hypothetical protein SOCG_01899	Schizosaccharomyces octosporus yFS286	96.6	100	99.8	0	N/A	N/A	N/A	1827	XM_013164852.1	hypothetical protein mRNA	Schizosaccharomyces octosporus yFS286	100	77.2	99.8	0	CU329671.1	65	77
YES	YES	Region 1	Wilmar-P_II_LHS_55332_6_19	685	XP_013020305.1	oligopeptide transporter 7	Schizosaccharomyces octosporus yFS286	91.5	81.5	100	0	N/A	N/A	N/A	2055	XM_013164851.1	oligopeptide transporter 7 mRNA	Schizosaccharomyces octosporus yFS286	100	79.6	100	0	N/A	N/A	N/A
YES	YES	Region 1	Wilmar-P_II_LHS_56962_1_20	179	N/A	N/A	N/A	N/A	N/A	N/A	N/A	N/A	N/A	N/A	537	XM_013164851.1	oligopeptide transporter 7 mRNA	Schizosaccharomyces octosporus yFS286	81.8	17	100	0	CU329672.1	75.4	19.7
YES	YES	Region 2	Wilmar-P_II_RHS-subtelomere_1459_1_1	596	XP_013022173.1	phthalate transporter	Schizosaccharomyces cryophilus OY26	97.7	99.8	78.2	0	N/A	N/A	N/A	1788	XM_013166719.1	phthalate transporter mRNA	Schizosaccharomyces cryophilus OY26	88.4	42.3	72.1	0	CU329671.1	65.5	81.3
YES	YES	Region 2	Wilmar-P_II_RHS-subtelomere_2890_4_2	167	N/A	N/A	N/A	N/A	N/A	N/A	N/A	N/A	N/A	N/A	501	XM_013166719.1	phthalate transporter mRNA	Schizosaccharomyces cryophilus OY26	71.9	9.6	74.2	5e-57	CU329671.1	69.7	57.3
YES	YES	Region 2	Wilmar-P_II_RHS-subtelomere_4114_4_3	773	XP_013020305.1	oligopeptide transporter 7	Schizosaccharomyces octosporus yFS286	99	99.7	82.1	0	N/A	N/A	N/A	2319	XM_013166716.1	oligopeptide transporter 7 partial mRNA	Schizosaccharomyces cryophilus OY26	92.5	93.1	75.6	0	N/A	N/A	N/A
YES	YES	Region 2	Wilmar-P_II_RHS-subtelomere_7449_6_4	597	ODV95720.1	hypothetical protein PACTADRAFT_76154	Pachysolen tannophilus NRRL Y-2460	91	98.2	60.1	0	N/A	N/A	N/A	1791	XM_015614379.1	hypothetical protein (AC631_05550), partial mRNA	Debaryomyces fabryi	68.3	74.7	69.1	3e-136	N/A	N/A	N/A
YES	YES	Region 2	Wilmar-P_II_RHS-subtelomere_14356_4_5	563	XP_013022167.1	amino acid permease	Schizosaccharomyces cryophilus OY26	97	99.1	73.7	0	N/A	N/A	N/A	1689	XM_013166713.1	amino acid permease partial mRNA	Schizosaccharomyces cryophilus OY26	83.7	84.8	71.5	0	N/A	N/A	N/A
YES	YES	Region 2	Wilmar-P_II_RHS-subtelomere_17433_6_6	419	XP_013020311.1	alpha-ketoglutarate-dependent sulfonate dioxygenase	Schizosaccharomyces octosporus yFS286	95	98.3	77.3	0	sp|B5BP48.1 - Putative alpha-ketoglutarate-dependent sulfonate dioxygenase	58	99.2	1257	XM_013166726.1	TfdA family Taurine catabolism dioxygenase TauD mRNA	Schizosaccharomyces cryophilus OY26	76.1	51.3	76.2	0	AB325691.1	66.2	72.1
YES	YES	Region 2	Wilmar-P_II_RHS-subtelomere_20370_3_7	832	NP_595014.1	putative sulfate transporter	Schizosaccharomyces pombe	98.4	99.2	89	0	N/A	N/A	N/A	2496	NM_001020445.2	putative sulfate transporter (SPAC869.05c), mRNA	Schizosaccharomyces pombe	90.5	70.7	94.2	0	N/A	N/A	N/A
YES	YES	Region 2	Wilmar-P_II_RHS-subtelomere_23715_3_8	586	XP_013270515.1	hypothetical protein Z518_06931	Rhinocladiella mackenziei CBS 650.93	89.8	96.7	77.5	0	N/A	N/A	N/A	1758	XM_013166723.1	amino acid transporter mRNA	Schizosaccharomyces cryophilus OY26	80.4	72.9	73.3	0	N/A	N/A	N/A
YES	YES	Region 2	Wilmar-P_II_RHS-subtelomere_27857_5_9	191	GAV28591.1	hypothetical protein PMKS-002062	Pichia membranifaciens	95.8	42.9	74.9	2e-83	N/A	N/A	N/A	573	XM_019163373.1	hypothetical protein partial mRNA	Pichia membranifaciens NRRL Y-2026	81	29.7	68.2	2e-35	N/A	N/A	N/A
YES	YES	Region 2	Wilmar-P_II_RHS-subtelomere_28519_4_10	238	XP_019017037.1	hypothetical protein PICMEDRAFT_59519	Pichia membranifaciens	90.3	42.6	54.7	7e-64	N/A	N/A	N/A	714	XM_016367719.1	hypothetical protein mRNA	Exophiala mesophila	9.7	2.8	79.7	1e-06	NM_001023368.2	70.3	15
YES	YES	Region 2	Wilmar-P_II_RHS-subtelomere_34726_4_11	608	NP_592787.1	dihydroxyacetone kinase Dak2	Schizosaccharomyces pombe	97.2	100	100	0	N/A	N/A	N/A	1824	AF059204	dihydroxyacetone kinase (DAK2) gene, complete cds	Schizosaccharomyces pombe	100	55.8	100	0	N/A	N/A	N/A
YES	YES	Region 2	Wilmar-P_II_RHS-subtelomere_36935_2_12	604	NP_592788.1	putative MIP superfamily protein	Schizosaccharomyces pombe	92.2	94	79	0	N/A	N/A	N/A	1812	NM_001018188.2	putative MIP superfamily protein (SPAC977.17), mRNA	Schizosaccharomyces pombe	87.9	44	81.2	0	N/A	N/A	N/A
YES	YES	Region 2	Wilmar-P_II_RHS_433_4_1	1364	NP_001018276.1	retrotransposable element	Schizosaccharomyces pombe	97.7	100	98.6	0	N/A	N/A	N/A	4092	NM_001018817.2	retrotransposable element (Tf2-2), mRNA	Schizosaccharomyces pombe	100	92.5	98.5	0	N/A	N/A	N/A
YES	YES	Region 2	Wilmar-P_II_RHS_6383_2_2	320	NP_001018767.1	CRCB domain-containing protein	Schizosaccharomyces pombe	97.2	100	97.4	0	N/A	N/A	N/A	960	NM_001020942.2	CRCB domain protein (SPBPB8B6.06c), mRNA	Schizosaccharomyces pombe	99.6	70.1	94.2	0	N/A	N/A	N/A
YES	YES	Region 2	Wilmar-P_II_RHS_7582_1_3	373	NP_001018766.1	putative L-asparaginase	Schizosaccharomyces pombe	95.4	100	98	0	N/A	N/A	N/A	1119	AF207958	sod2 amplicon, partial sequence	Schizosaccharomyces pombe strain B	98.4	99.5	96.8	0	N/A	N/A	N/A
YES	YES	Region 2	Wilmar-P_II_RHS_14096_2_4	551	NP_001018762.2	putative hexose transporter Ght7	Schizosaccharomyces pombe	94	100	96.7	0	N/A	N/A	N/A	1653	NM_001020937.3	putative hexose transporter Ght7 (ght7), mRNA	Schizosaccharomyces pombe	100	93.7	96.5	0	N/A	N/A	N/A
YES	YES	Region 2	Wilmar-P_II_RHS_17177_5_5	188	XP_013016587.1	zinc finger protein	Schizosaccharomyces octosporus yFS286	93.1	31.7	32.8	4e-28	NP_001343041.1 - zinc finger protein	85.1	17.5	564	CU329671.1	chromosome II, complete sequence	Schizosaccharomyces pombe	99.5	0	92.3	0	N/A	N/A	N/A
YES	YES	Region 2	Wilmar-P_II_RHS_22258_1_6	665	NP_592772.1	putative phospholipase	Schizosaccharomyces pombe	95.6	94.5	94	0	N/A	N/A	N/A	1995	NM_001018181.2	putative phospholipase (SPAC977.09c), mRNA	Schizosaccharomyces pombe	99.4	80	91.5	0	N/A	N/A	N/A
YES	YES	Region 2	Wilmar-P_II_RHS_25562_5_7	170	NP_592771.1	putative dehydrogenase	Schizosaccharomyces pombe	98.8	71.2	90.5	1e-106	N/A	N/A	N/A	510	NM_001018180.2	putative dehydrogenase (SPAC977.08), mRNA	Schizosaccharomyces pombe	100	61.9	92.6	0	N/A	N/A	N/A
YES	YES	Region 2	Wilmar-P_II_RHS_29368_1_8	430	NP_592770.1	putative glycoprotein	Schizosaccharomyces pombe	99.1	100	93.4	0	N/A	N/A	N/A	1290	NM_001018179.1	putative glycoprotein (SPAC977.07c), partial mRNA	Schizosaccharomyces pombe	99.1	99.8	93.7	0	N/A	N/A	N/A
YES	YES	Region 2	Wilmar-P_II_RHS_32879_5_9	193	NP_596853.2	uncharacterized protein SPBPB2B2.07c	Schizosaccharomyces pombe	86.5	66.8	91.6	7e-99	N/A	N/A	N/A	579	NM_001020932.2	uncharacterized protein (SPBC1348.07), mRNA	Schizosaccharomyces pombe	91.9	45.9	95.7	0	N/A	N/A	N/A
YES	YES	Region 2	Wilmar-P_II_RHS_36190_1_10	257	NP_592768.1	uncharacterized protein SPBC1348.06c	Schizosaccharomyces pombe	79	100	100	3e-148	N/A	N/A	N/A	771	NM_001020931.1	uncharacterized protein (SPBC1348.06c), partial mRNA	Schizosaccharomyces pombe	79.1	99.2	99	0	N/A	N/A	N/A
YES	YES	Region 2	Wilmar-P_II_RHS_37971_6_11	294	NP_595028.1	uncharacterized transporter SPAC750.02c	Schizosaccharomyces pombe	90.5	54.8	98.1	0	N/A	N/A	N/A	882	NM_001020458.2	putative transporter (SPAC750.02c), partial mRNA	Schizosaccharomyces pombe	100	51.5	98.9	0	N/A	N/A	N/A
YES	YES	Region 2	Wilmar-P_II_RHS_38714_5_12	253	NP_595028.1	uncharacterized transporter SPAC750.02c	Schizosaccharomyces pombe	88.5	46.2	98.7	2e-152	N/A	N/A	N/A	759	NM_001023885.1	putative MFS family membrane transporter (SPBPB2B2.16c), partial mRNA	Schizosaccharomyces pombe	93.7	48.8	98.7	0	N/A	N/A	N/A
YES	YES	Region 2	Wilmar-P_II_RHS_40322_5_13	222	NP_592766.1	uncharacterized methyltransferase SPBC1348.04	Schizosaccharomyces pombe	61.7	94.5	97.1	2e-92	N/A	N/A	N/A	666	NM_001020929.2	putative methyltransferase (SPBC1348.04), partial mRNA	Schizosaccharomyces pombe	73.4	85.4	96.9	0	N/A	N/A	N/A
YES	YES	Region 2	Wilmar-P_II_RHS_43970_5_14	183	NP_592774.1	uncharacterized membrane protein SPAC977.01	Schizosaccharomyces pombe	95.6	53.5	54.9	4e-55	N/A	N/A	N/A	549	NM_001023888.2	transmembrane helix domain-containing protein (SPBPB2B2.19c), mRNA	Schizosaccharomyces pombe	95.8	31.7	71.6	4e-70	N/A	N/A	N/A
YES	YES	Region 2	Wilmar-P_II_RHS_45209_2_15	252	NP_001343048.1	uncharacterized protein SPBCPT2R1.02	Schizosaccharomyces pombe	46.8	99.2	89	1e-69	N/A	N/A	N/A	756	NM_001018172.1	uncharacterized protein (SPAC212.02), partial mRNA	Schizosaccharomyces pombe	53.7	100	88.4	1e-146	N/A	N/A	N/A
YES	YES	Region 2	Wilmar-P_II_RHS_51602_2_16	377	NP_592785.1	Putative aryl-alcohol dehydrogenase SPAC977.14c	Schizosaccharomyces pombe	93.1	100	89.7	0	N/A	N/A	N/A	1131	NM_001356212.1	aldo/keto reductase family protein (SPAC750.01), partial mRNA	Schizosaccharomyces pombe	92.8	99.7	90.4	0	N/A	N/A	N/A
YES	YES	Region 2	Wilmar-P_II_RHS_54419_2_17	218	NP_001343051.1	RecQ type DNA helicase Tlh1	Schizosaccharomyces pombe	93.6	12.5	37.3	4e-39	N/A	N/A	N/A	654	NM_001355852.1	RecQ type DNA helicase Tlh1 (tlh2), partial mRNA	Schizosaccharomyces pombe	16.8	1.8	77	9e-09	N/A	N/A	N/A
YES	YES	Region 2	Wilmar-P_II_RHS_62392_4_18	173	N/A	N/A	N/A	N/A	N/A	N/A	N/A	N/A	N/A	N/A	519	NM_001018168.1	RecQ type DNA helicase (tlh1), partial mRNA	Schizosaccharomyces pombe	100	9.2	99.6	0	N/A	N/A	N/A
YES	YES	Region 2	Wilmar-P_II_RHS_58490_2_19	2026	NP_001343051.1	RecQ type DNA helicase Tlh1	Schizosaccharomyces pombe	95.2	99.6	97.2	0	N/A	N/A	N/A	6078	NM_001355852.1	RecQ type DNA helicase (tlh1), partial mRNA	Schizosaccharomyces pombe	95.1	95.3	97.7	0	N/A	N/A	N/A

## Sheet: Table S10 novel genes RNA-seq
Table S10 RNA-seq analysis of non S. pombe ORFs in the Wilmar genetic background
Region	ORF Name	ORF ID	Description	Species	FPKM
					Glucose	Glucose-deficient	Glucose-starved
Region 1	Wilmar-P_II_LHS_22777_4_7	XP_013020847.1	hypothetical protein SOCG_06266	Schizosaccharomyces octosporus yFS286	16.4861	13.3643	0.915894
Region 1	Wilmar-P_II_LHS_29840_5_8	KOS40269.1	hypothetical protein ACN38_g8863	Penicillium nordicum	59.1735	108.766	110.9
Region 1	Wilmar-P_II_LHS_32018_5_9	XP_013019555.1	hypothetical protein SOCG_16325	Schizosaccharomyces octosporus yFS286	6.06285	5.5818	2.25992
Region 1	Wilmar-P_II_LHS_35206_4_10	XP_013020313.1	alcohol dehydrogenase	Schizosaccharomyces octosporus yFS286	43.6045	191.898	3185.41
Region 1	Wilmar-P_II_LHS_38016_3_11	XP_013020312.1	arylsulfatase	Schizosaccharomyces octosporus yFS286	20.9235	29.1576	10.4866
Region 1	Wilmar-P_II_LHS_40663_1_12	XP_013020311.1	alpha-ketoglutarate-dependent sulfonate dioxygenase	Schizosaccharomyces octosporus yFS286	6.44383	5.39184	3.44452
Region 1	Wilmar-P_II_LHS_41286_3_13	XP_013020311.1	alpha-ketoglutarate-dependent sulfonate dioxygenase	Schizosaccharomyces octosporus yFS286	6.40418	5.51772	4.22815
Region 1	Wilmar-P_II_LHS_42284_5_14	XP_013020310.1	aromatic amino acid aminotransferase	Schizosaccharomyces octosporus yFS286	9.27826	15.5479	208.485
Region 1	Wilmar-P_II_LHS_44513_5_15	XP_013020309.1	elongation factor 1-gamma	Schizosaccharomyces octosporus yFS286	26.136	142.368	1139.93
Region 1	Wilmar-P_II_LHS_48914_2_16	XP_013020308.1	CRCB domain-containing protein	Schizosaccharomyces octosporus yFS286	30.9457	28.9693	16.1023
Region 1	Wilmar-P_II_LHS_50400_6_17	XP_013020307.1	NADPH-dependent FMN reductase	Schizosaccharomyces octosporus yFS286	13.3802	12.4948	10.0766
Region 1	Wilmar-P_II_LHS_52106_2_18	XP_013020306.1	hypothetical protein SOCG_01899	Schizosaccharomyces octosporus yFS286	5.88243	5.49317	19.2233
Region 1	Wilmar-P_II_LHS_55332_6_19	XP_013020305.1	oligopeptide transporter 7	Schizosaccharomyces octosporus yFS286	2.46776	2.06423	0.883382
Region 2	Wilmar-P_II_RHS-subtelomere_1459_1_1	XP_013022173.1	phthalate transporter	Schizosaccharomyces cryophilus OY26	0.578526	1.18987	0.646219
Region 2	Wilmar-P_II_RHS-subtelomere_4114_4_3	XP_013020305.1	oligopeptide transporter 7	Schizosaccharomyces octosporus yFS286	0.275324	0.28693	0.115208
Region 2	Wilmar-P_II_RHS-subtelomere_7449_6_4	ODV95720.1	hypothetical protein PACTADRAFT_76154	Pachysolen tannophilus NRRL Y-2460	0.0662838	0.0782246	0
Region 2	Wilmar-P_II_RHS-subtelomere_14356_4_5	XP_013022167.1	amino acid permease	Schizosaccharomyces cryophilus OY26	0.215036	0.56505	0.321782
Region 2	Wilmar-P_II_RHS-subtelomere_17433_6_6	XP_013020311.1	alpha-ketoglutarate-dependent sulfonate dioxygenase	Schizosaccharomyces octosporus yFS286	0.414007	0.736346	0.497757

[truncated: 5 more sheets: Table S11 Wilmar RNAseq DGE, Table S12 Angeli GO analysis, Table S13 Wilmar-P Scr1 ChIP , Table S14 972h- Scr1 ChIP, Table S15 - Molasses RNA-seq]
